# Supplementary material for: Reversible electrochemical oxidation of sulfur in ionic liquid for high-voltage Al−S batteries
Source: PubMed Central journal article supplement (PMC8481422; doi:10.1038/s41467-021-26056-7), 2021-09-29
Supplement: 41467_2021_26056_MOESM1_ESM.pdf [file 41467_2021_26056_MOESM1_ESM.pdf]

## Supplementary Information

### **Reversible electrochemical oxidation of sulfur in ionic liquid for high-voltage Al–S batteries**

Huan Li<sup>1†</sup>, Rongwei Meng<sup>2†</sup>, Yong Guo<sup>2</sup>, Biao Chen<sup>3</sup>, Yan Jiao<sup>1</sup>, Chao Ye<sup>1</sup>, Yu Long<sup>2</sup>, Anton Tadich,<sup>4</sup>  
Quan-Hong Yang<sup>2</sup>, Mietek Jaroniec<sup>5</sup> and Shi-Zhang Qiao<sup>\*1</sup>

<sup>1</sup>School of Chemical Engineering and Advanced Materials, The University of Adelaide, Adelaide, SA 5005, Australia;

<sup>2</sup>Nanoyang Group, State Key Laboratory of Chemical Engineering, School of Chemical Engineering and Technology, Tianjin University, Tianjin 300072, China;

<sup>3</sup>School of Materials Science and Engineering and Tianjin Key Laboratory of Composite and Functional Materials, Tianjin University, Tianjin 300350, China.

<sup>4</sup>Australian Synchrotron (ANSTO), 800 Blackburn Rd, Clayton, VIC 3168, Australia

<sup>5</sup>Department of Chemistry and Biochemistry & Advanced Materials and Liquid Crystal Institute, Kent State University, Kent, OH 44242, USA.

<sup>†</sup>These authors contribute equally to this work.

\* Corresponding author e-mail: [s.qiao@adelaide.edu.au](mailto:s.qiao@adelaide.edu.au)

## Supplementary Results

----- S/AlSCl<sub>2</sub>,  $\approx 0.2\sim 0.8$  V, sulfur oxidation

----- H<sup>2</sup>/H<sup>+</sup>, SHE, 0 V

----- S/S<sup>2-</sup>,  $\approx -0.9\sim -0.7$  V, sulfur reduction

----- Al/Al<sup>3+</sup>, -1.66 V

----- Na/Na<sup>+</sup>, -2.71 V

----- Li/Li<sup>+</sup>, -3.04 V

**Supplementary Figure S1** The estimated equilibrium electrochemical potentials of sulfur reduction and sulfur oxidation.

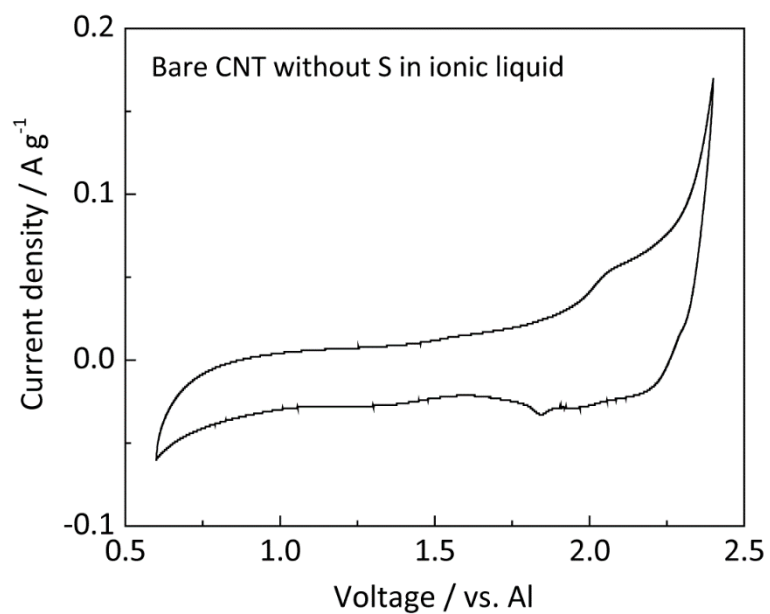

**Supplementary Figure S2** CV curves of bare CNT in AlCl<sub>3</sub>/urea with a scan rate of 0.5 mV s<sup>-1</sup>. The CV data show much lower current density (y axis), suggesting the low electrochemical activity of CNT in ionic liquid.

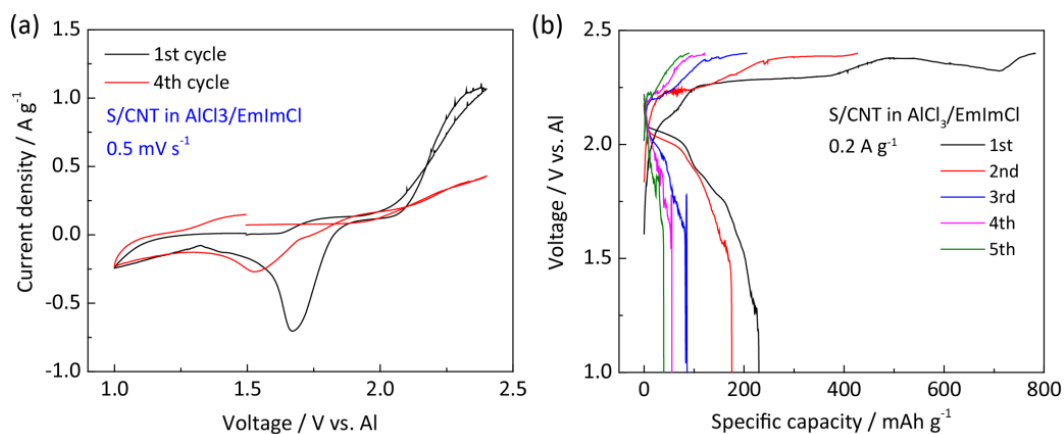

**Supplementary Figure S3 The electrochemical oxidation of sulfur in AlCl<sub>3</sub>/EmimCl electrolyte.**

The molar ratio of AlCl<sub>3</sub> to EmimCl is 1.3:1. (a) CV curves of S/CNT from 1.0 V to 2.4 V at a scan rate of 0.5 mV s<sup>-1</sup>. The severely decreased peak currents can be seen from the 1st cycle and 4th cycle, indicating the poor reversibility of sulfur in this electrolyte. (b) Charge-discharge curves of S/CNT from 1.0 V to 2.4 V at 0.2 A g<sup>-1</sup>. The discharge capacity dramatically decreases from 230 mAh g<sup>-1</sup> to 41 mAh g<sup>-1</sup> from 1st to 5th cycles, confirming the instability of sulfur in this electrolyte during electrochemical oxidation.

(a) Elemental Sulfur  
orthorhombic crystal  
Space group : Fddd

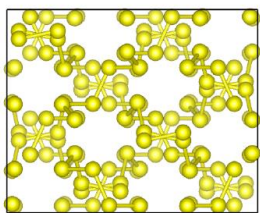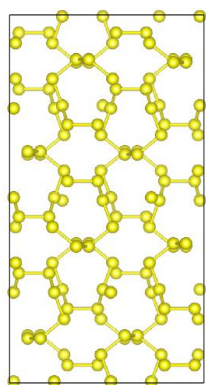

(b)  $AlCl_7$   
Monoclinic crystal  
Space group : Pc

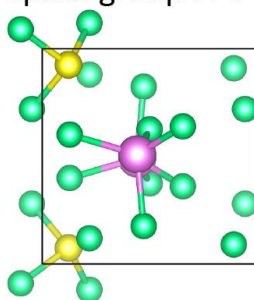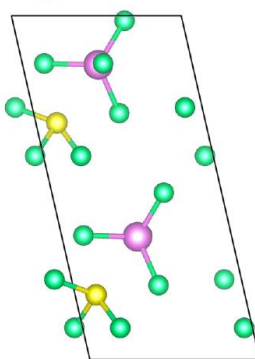

(c)  $Al_2S_3$   
Hexagonal crystal  
Space group :  $P6_1$

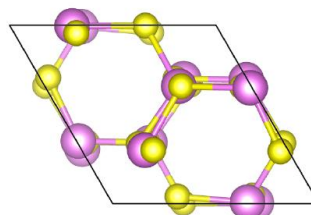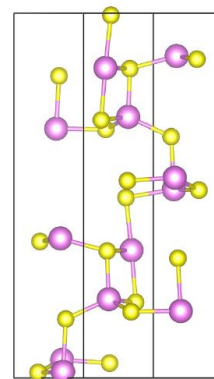

**Supplementary Figure S4** The models, crystal structures and space groups of elemental sulfur,  $AlCl_7$  and  $Al_2S_3$ . The purple, yellow and green atoms denote Al, S and Cl, respectively.

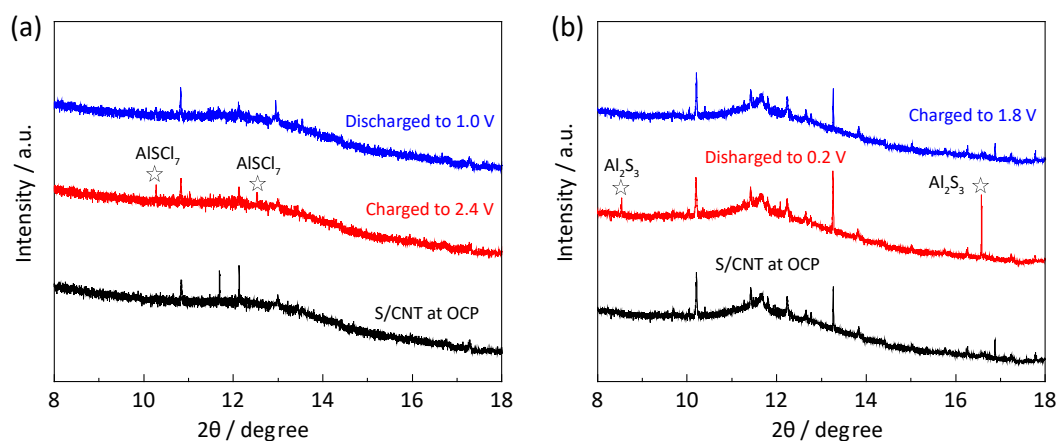

**Supplementary Figure S5** The XRD patterns of S/CNT composite cathodes at different cut-off voltages based on (a)  $\text{AlSCl}_7$  and (b)  $\text{Al}_2\text{S}_3$  products. The corresponding wavelengths are 0.7290 nm and 0.6868 nm, respectively. For sulfur oxidation, the diffraction peaks of  $\text{AlSCl}_7$  can be clearly observed at 2.4 V. These peaks disappear after discharging to 1.0 V due to the reversible conversion from  $\text{AlSCl}_7$  to sulfur. For sulfur reduction, the peaks assigned to  $\text{Al}_2\text{S}_3$  are seen at 0.2 V, and these peaks disappear at 1.8 V, suggesting the transformation from  $\text{Al}_2\text{S}_3$  to sulfur during charge process.

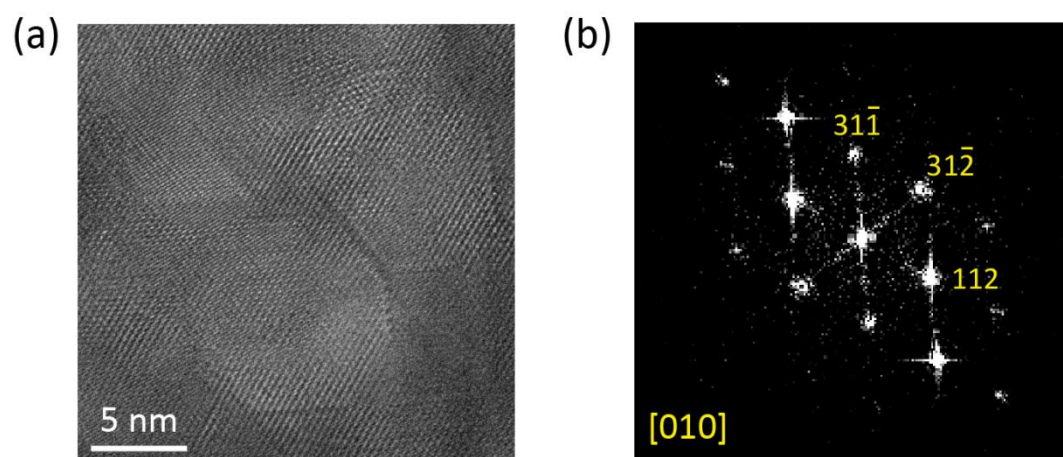

**Supplementary Figure S6** (a) High-resolution TEM image of S<sub>8</sub>; (b) The transformed FFT patterns.

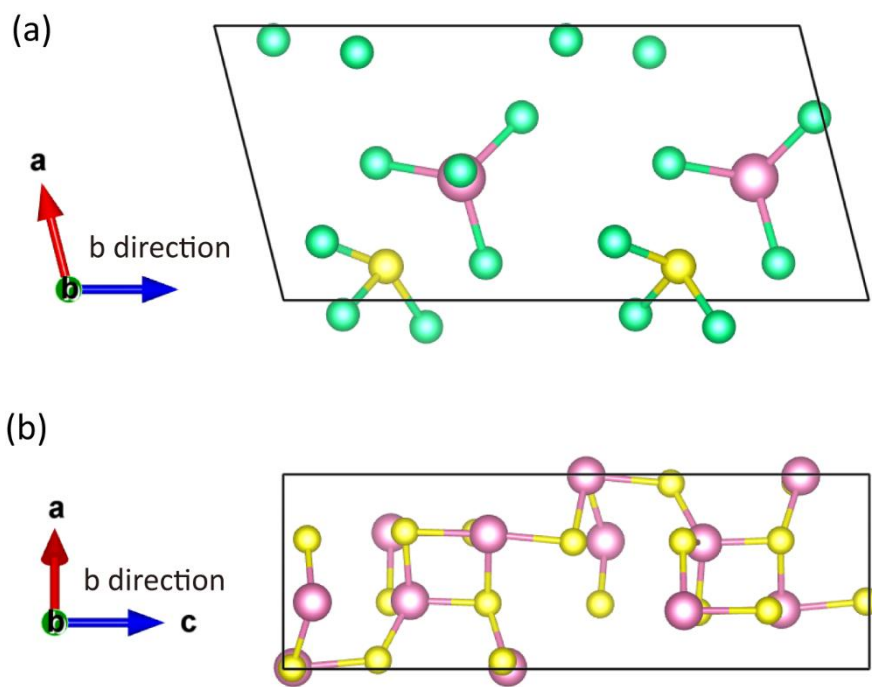

**Supplementary Figure S7** The optimized models of  $\text{AlCl}_7$  and  $\text{Al}_2\text{S}_3$ . The angles between a-axis and c-axis correspond well with the STEM observation as shown in Figure 2b and 2d.



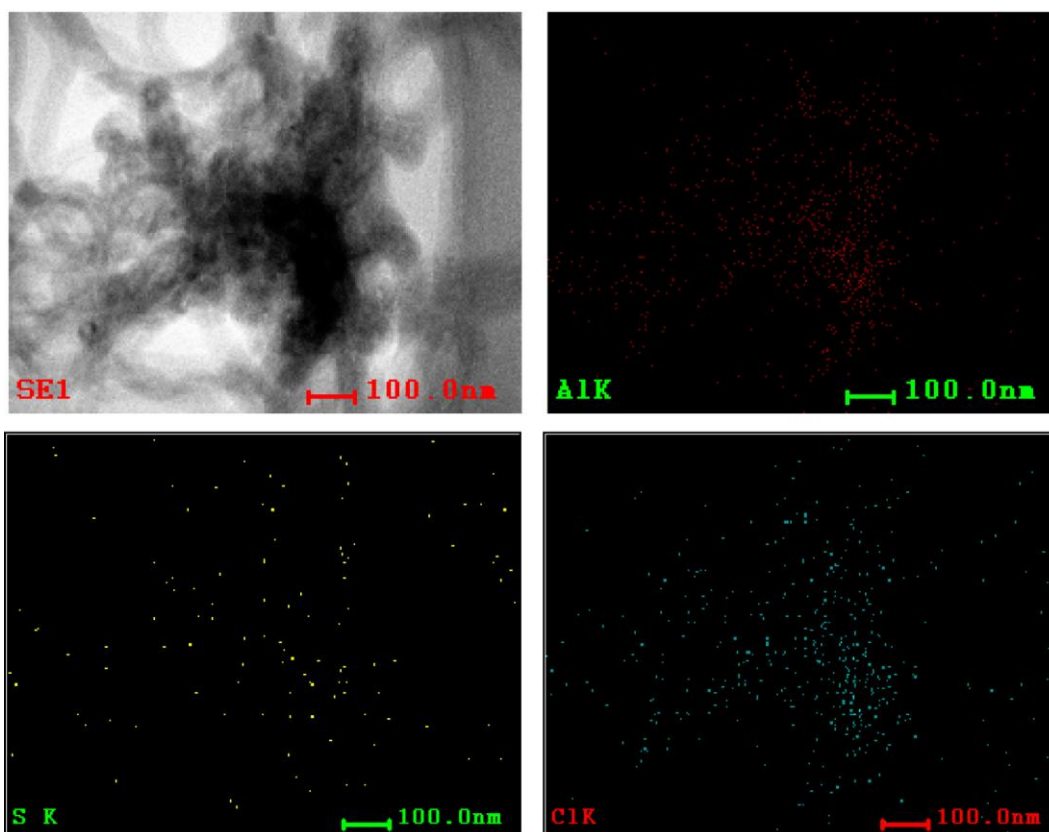

**Supplementary Figure S8** TEM image of  $\text{AlSCl}_7$  and its elemental mapping of Al, S, Cl.  $\text{AlSCl}_7$  was obtained by disassembly of the Al-S battery after charging to 2.4 V. Obvious Al and Cl are observed on these images, suggesting the formation of  $\text{AlSCl}_7$  during charging process.

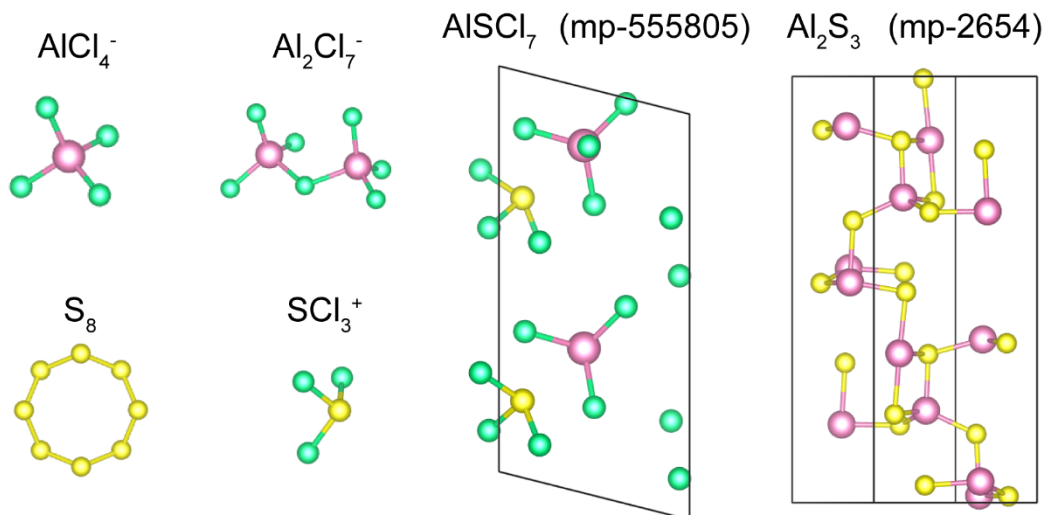

**Supplementary Figure S9** The optimized theoretical structures of  $\text{AlCl}_4^-$ ,  $\text{Al}_2\text{Cl}_7^-$ ,  $\text{S}_8$ ,  $\text{SCl}_3^+$ ,  $\text{AlSCl}_7$  and  $\text{Al}_2\text{S}_3$ .

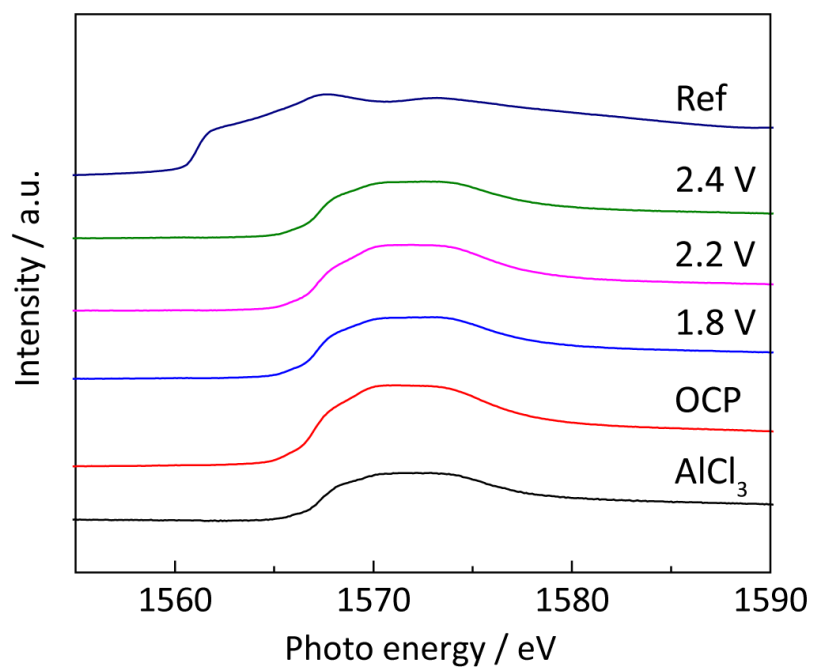

**Supplementary Figure S10** The Al K edge NEXAFS spectra of sulfur cathodes at different charging potentials. Compared to the obvious peak shift of S and Cl (Figure 3a and 3b), no peak shift is visible during charging process. These results indicate that the Al valence remains unchanged during cycling.

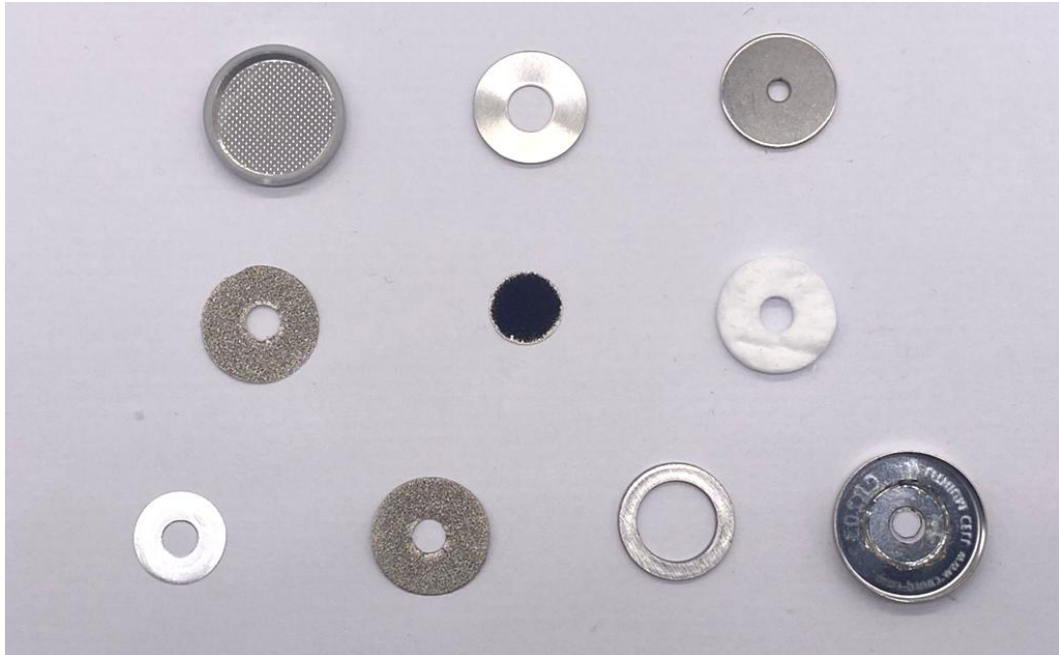

**Supplementary Figure S11** The cell configurations for the *in-situ* Raman testing in Figure 4d.

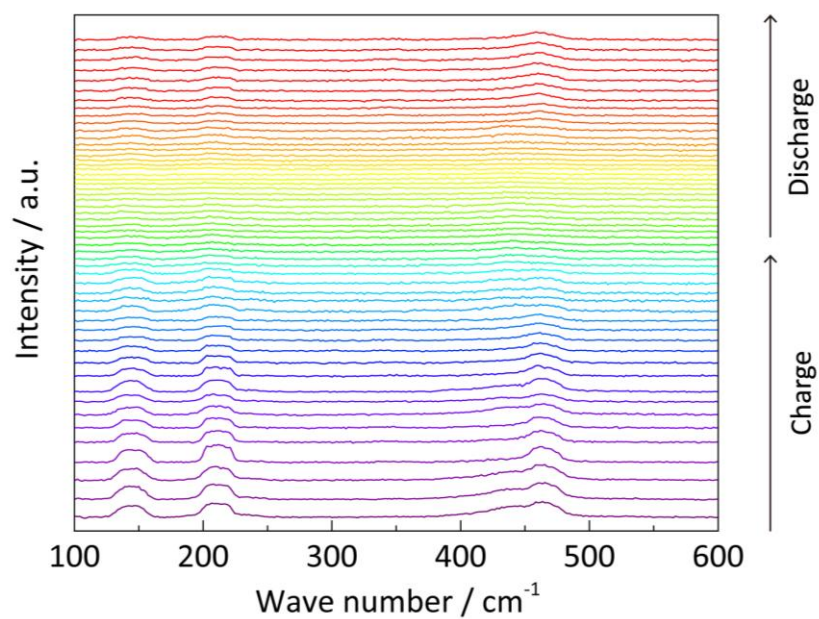

**Supplementary Figure S12** The *in-situ* Raman spectra of sulfur cathode in Al-S battery. The decreased peak density of sulfur is visible during charging process, while the peaks emerge as the battery is discharged.

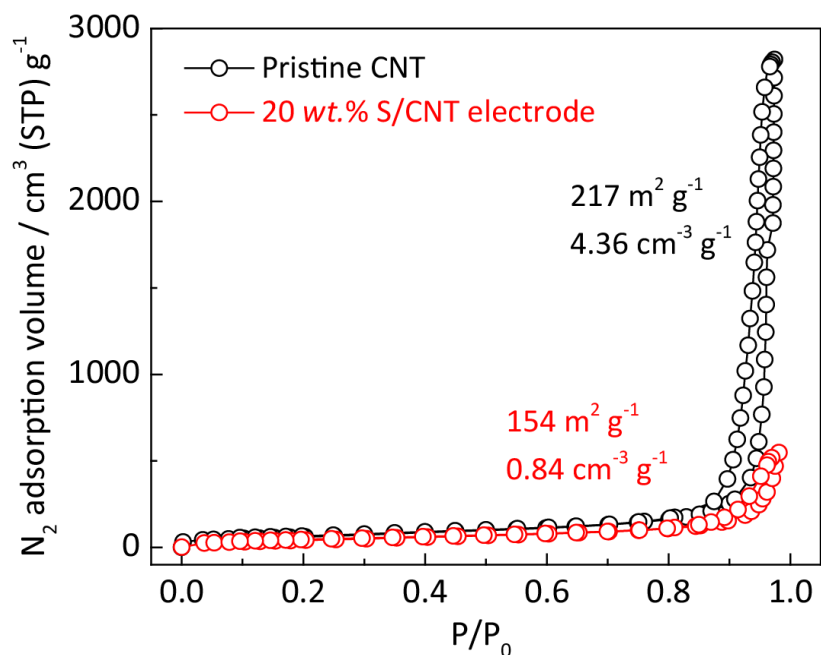

**Supplementary Figure S13 N<sub>2</sub> adsorption-desorption isotherms (77 K) for pristine CNT and composite electrode with 20 wt.% sulfur in S/CNT.** The pristine CNT shows a specific surface area of 217 m<sup>2</sup> g<sup>-1</sup> with a pore volume of 4.36 cm<sup>3</sup> g<sup>-1</sup>. After processing the S/CNT electrode with 20 wt.% sulfur, its specific surface area decreases to 154 m<sup>2</sup> g<sup>-1</sup>, and meanwhile the pore volume decreases to 0.84 cm<sup>3</sup> g<sup>-1</sup>. These decreases are attributed to the sulfur presence inside the CNT host.

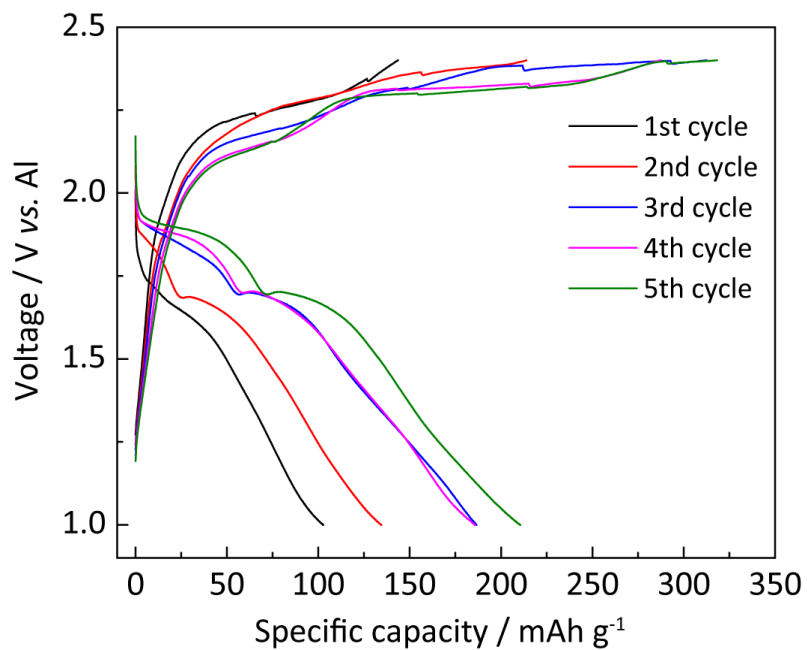

**Supplementary Figure S14** The charge-discharge curves of Al-S batteries from 1<sup>st</sup> cycle to 5<sup>th</sup> cycle at 0.2 A g<sup>-1</sup>. A pre-activation process with several electrochemical cycles is needed to activate the assembled fresh Al-S battery.

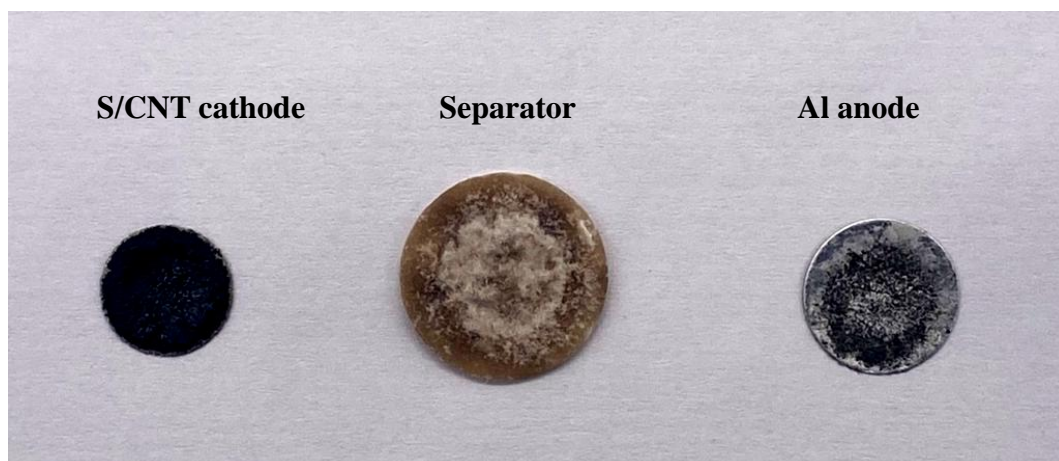

**Supplementary Figure S15** Digital photos of sulfur cathode, separator and Al anode disassembled from the cycled Al-S batteries.



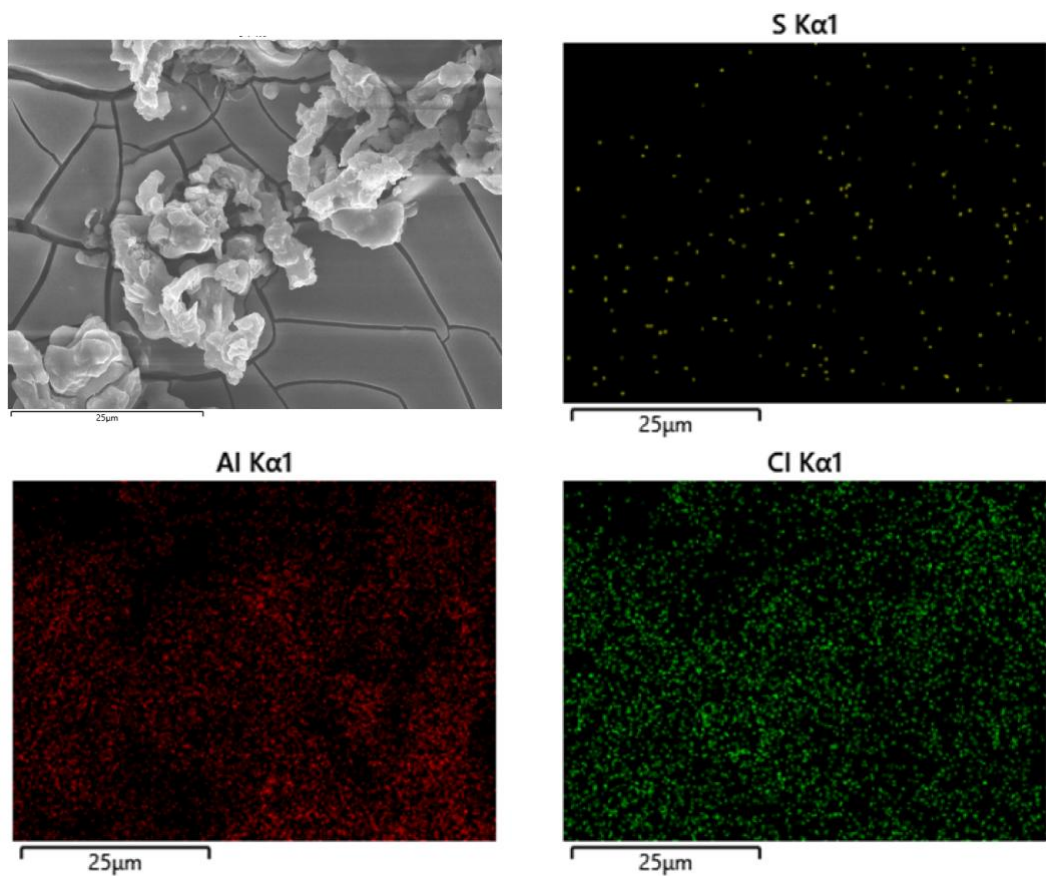

**Supplementary Figure S16** The SEM image of cycled Al anode and its elemental mappings. There are obvious S and Cl signals for Al anode after cycling. This confirms the dissolution of  $\text{SCl}_3^+$  and its migration to the anode side, leading to the capacity decay.

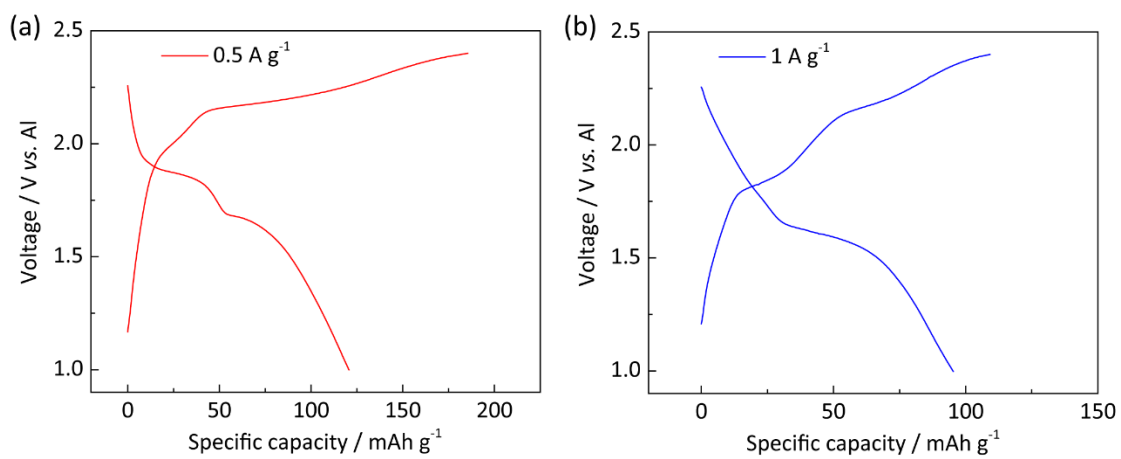

**Supplementary Figure S17** Charge-discharge curves of Al-S batteries at 0.5 A g<sup>-1</sup> and 1 A g<sup>-1</sup>.

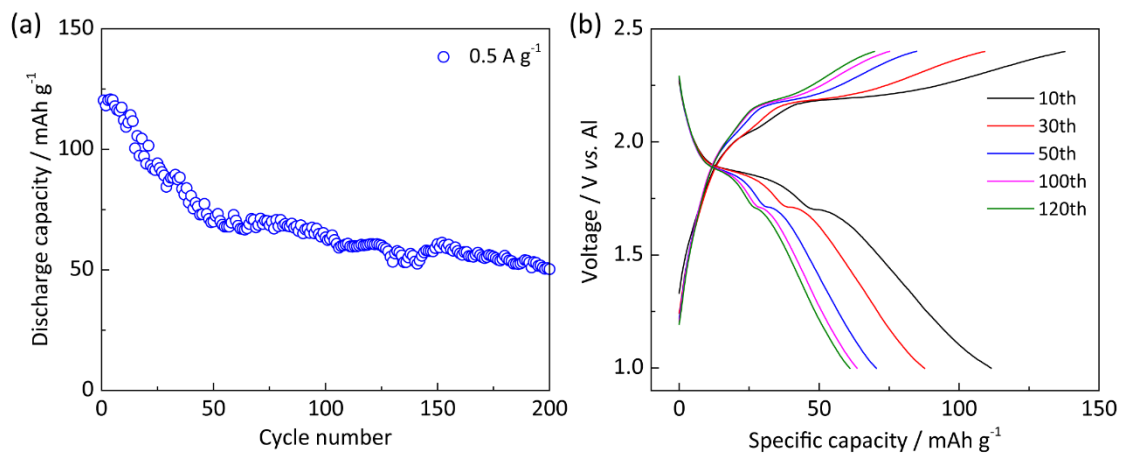

**Supplementary Figure S18** (a) Cycling performance of Al-S battery at 0.5 A g<sup>-1</sup>; (b) The charge-discharge curves at different cycles.

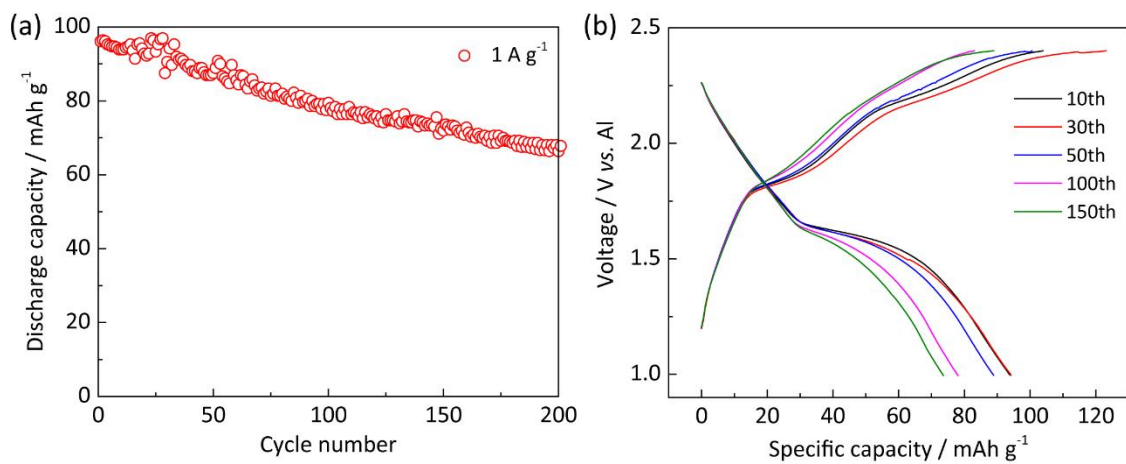

**Supplementary Figure S19** (a) Cycling performance of Al-S battery at 1 A g<sup>-1</sup>; (b) The charge-discharge curves at different cycles.

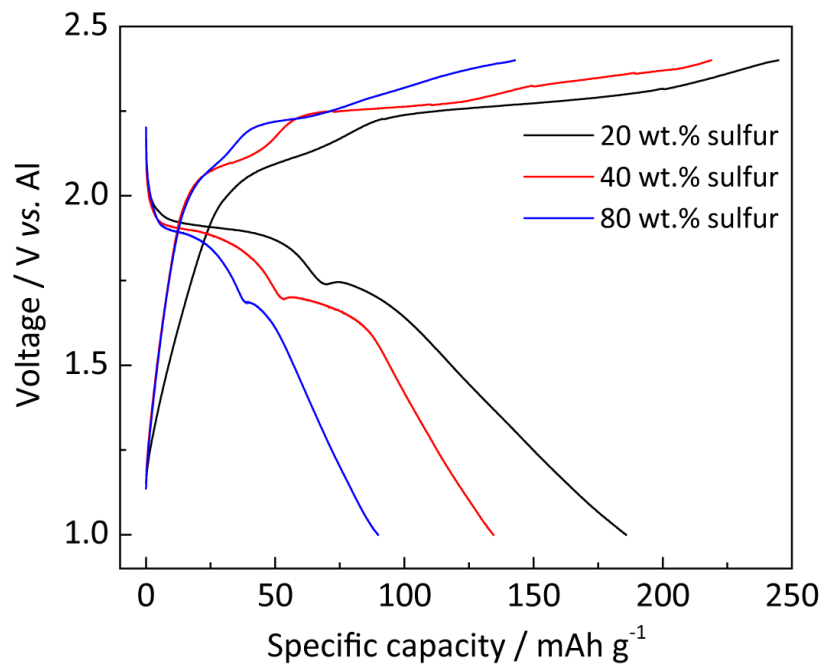

**Supplementary Figure S20** Charge-discharge curves of Al-S batteries with different sulfur content in S/CNT composites. The applied current density is 0.2 A g<sup>-1</sup>.

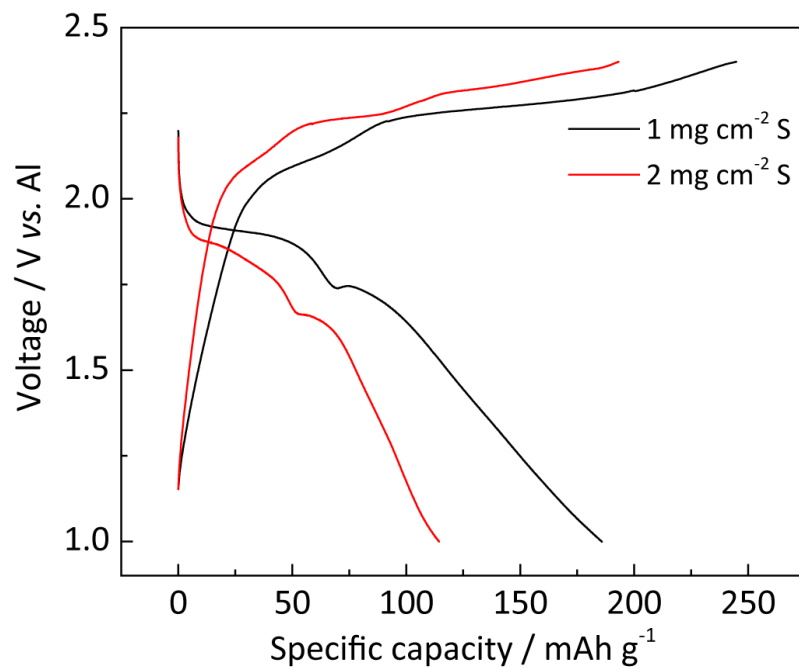

**Supplementary Figure S21** Charge-discharge curves of Al-S batteries with different areal loadings of sulfur. The applied current density is 0.2 A g<sup>-1</sup>.

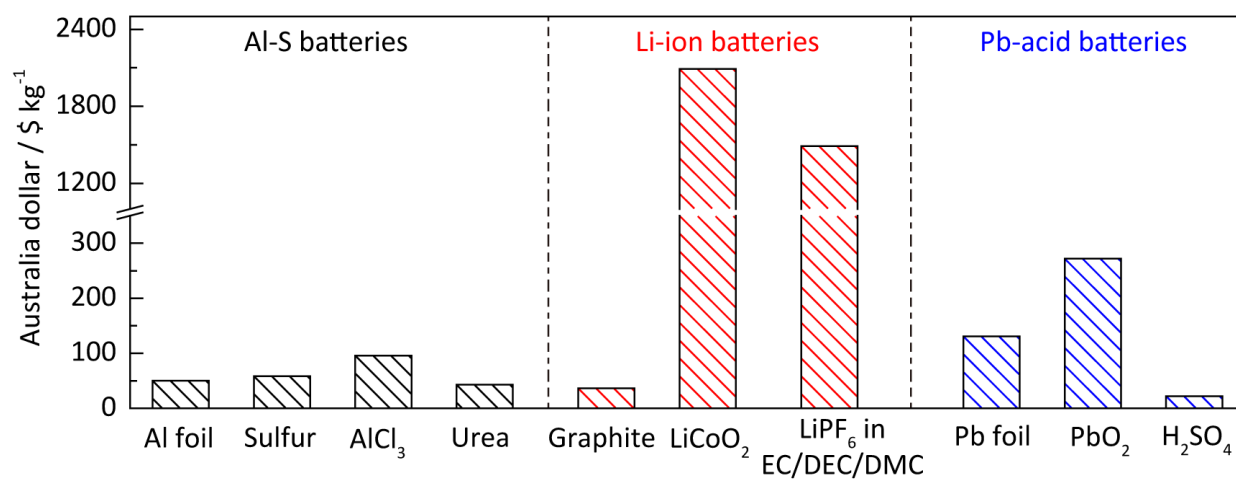

**Supplementary Figure S22** The price comparison of electrode materials and electrolytes for Al-S, Li-ion and Pb-acid batteries.

**Supplementary Table S1** The performance comparison with the reported cathode materials in ionic liquid electrolytes

| Reported materials              |                                           | Electrolyte                                | Discharge voltage / V | Specific capacity / mAh g <sup>-1</sup> | Cycling life | Final capacity / mAh g <sup>-1</sup> | Ref       |
|---------------------------------|-------------------------------------------|--------------------------------------------|-----------------------|-----------------------------------------|--------------|--------------------------------------|-----------|
| Sulfur oxidation<br>(This work) | S/CNT                                     | AlCl <sub>3</sub> /urea                    | ~1.7 – 1.9 V          | ~225                                    | 200          | ~105                                 | This work |
| Sulfur reduction                | S/carbon cloth                            | AlCl <sub>3</sub> /EmImCl                  | ~ 0.6 V               | ~1300                                   | 20           | ~1000                                | 1         |
|                                 | S/CNF paper                               | Li <sup>+</sup> -AlCl <sub>3</sub> /EmImCl | ~ 0.75 V              | ~1000                                   | 50           | ~600                                 | 2         |
|                                 | S/CMK-3                                   | AlCl <sub>3</sub> /NBMPBr                  | ~ 0.2 – 0.6 V         | ~1400                                   | 20           | ~600                                 | 3         |
|                                 | S/Co+C                                    | AlCl <sub>3</sub> /EmImCl                  | ~ 0.1 – 0.8 V         | ~1600                                   | 200          | ~500                                 | 4         |
|                                 | S/CNF+coated separator                    | AlCl <sub>3</sub> /EmImCl                  | ~ 0.95 V              | ~1250                                   | 10           | ~600                                 | 5         |
| Metal oxides                    | Binder-free V <sub>2</sub> O <sub>5</sub> | AlCl <sub>3</sub> /BmImCl                  | ~ 0.5 – 0.7 V         | ~240                                    | 5            | ~180                                 | 6         |
|                                 | V <sub>2</sub> O <sub>5</sub> nanowires   | AlCl <sub>3</sub> /EmImCl                  | ~ 0.55 V<br>~ 0.2 V   | ~305                                    | 20           | ~273                                 | 7         |
|                                 | Anatase TiO <sub>2</sub>                  | AlCl <sub>3</sub> /EmImCl                  | ~ 0.5 V               | ~120                                    | N/A          | N/A                                  | 8         |
|                                 | Co <sub>3</sub> O <sub>4</sub>            | AlCl <sub>3</sub> /EmImCl                  | ~ 0.2 – 0.7 V         | ~490                                    | 100          | ~122                                 | 9         |
| Metal sulfides                  | Co <sub>3</sub> S <sub>4</sub>            | AlCl <sub>3</sub> /EmImCl                  | ~ 0.7 V               | ~290                                    | 150          | ~90                                  | 10        |
|                                 | Mo <sub>6</sub> S <sub>8</sub>            | AlCl <sub>3</sub> /BmImCl                  | ~ 0.55 V,<br>~0.38 V  | ~167                                    | 50           | ~70                                  | 11        |
|                                 | CuS                                       | AlCl <sub>3</sub> /EmImCl                  | ~ 0.1 – 1.0 V         | ~250                                    | 100          | ~100                                 | 12        |
|                                 | MoS <sub>2</sub>                          | AlCl <sub>3</sub> /EmImCl                  | ~ 0.4 – 0.8 V         | ~253                                    | 100          | ~67                                  | 13        |
| Metal chlorides                 | VCl <sub>3</sub>                          | AlCl <sub>3</sub> /EmImCl                  | ~ 1.0 V               | ~76                                     | 10           | ~10                                  | 14        |
| Polymers                        | polypyrrole                               | AlCl <sub>3</sub> /EmImCl                  | N/A                   | ~70                                     | 100          | ~50                                  | 15        |
|                                 | polythiophene                             |                                            | ~ 0.8 – 1.2 V         | ~90                                     | 100          | ~70                                  |           |
| Graphitic carbons               | 3D graphitic foam                         | AlCl <sub>3</sub> /EmImCl                  | ~ 1.5 – 2.2 V         | ~60                                     | 7500         | ~60                                  | 16        |
|                                 | Carbon paper                              | AlCl <sub>3</sub> /EmImCl                  | ~ 1.6 – 2.0 V         | ~85                                     | 50           | ~85                                  | 17        |
|                                 | Graphene nanoribbons                      | AlCl <sub>3</sub> /EmImCl                  | ~ 1.6 – 2.0 V         | ~110                                    | 10000        | ~123                                 | 18        |



**Supplementary Table S2** The DFT-based energy (EDFT), zero-point energy (ZPE), entropy (TS) and Gibbs free energy (G) of different solids and ions

|                  | Al    | AlCl <sub>4</sub> <sup>-</sup> | Al <sub>2</sub> Cl <sub>7</sub> <sup>-</sup> | AlSCl <sub>7</sub> | Al <sub>2</sub> S <sub>3</sub> | S     | Al <sup>3+</sup> | SCl <sub>3</sub> <sup>+</sup> | Cl <sup>-</sup> |
|------------------|-------|--------------------------------|----------------------------------------------|--------------------|--------------------------------|-------|------------------|-------------------------------|-----------------|
| E <sub>DFT</sub> | -3.75 | -22.43                         | -37.97                                       | -28.1              | -25.18                         | -4.13 | -0.27            | -3.54                         | -5.05           |
| ZPE              | 0.032 | 0.12                           | 0.27                                         | 0.315              | 0.25                           | 0.041 | 0                | 0.04                          | 0               |
| TS               | 0.055 | 0.44                           | 0.73                                         | 0.89               | 0.35                           | 0.085 | 0.14             | 0.34                          | 0.08            |
| G                | -3.77 | -22.76                         | -38.43                                       | -28.67             | -25.28                         | -4.17 | -0.42            | -3.84                         | -5.13           |

**Supplementary Table S3** The price list of electrode materials for Al-S, Li-ion and Pb-acid batteries based on the Sigma-Aldrich and Alfa Aesar catalogs.

| <b>Battery</b>         | <b>Components</b> | <b>Product</b>                  | <b>SKU-pack size</b>             | <b>Price / AUSS kg<sup>-1</sup></b> |
|------------------------|-------------------|---------------------------------|----------------------------------|-------------------------------------|
| <b>Al-S battery</b>    | anode             | Al foil                         | Z185140-1EA                      | 50.2                                |
|                        | cathode           | sulfur                          | 13825-1KG-R                      | 58.4                                |
|                        | electrolyte       | AlCl <sub>3</sub>               | 11019-6KG                        | 96                                  |
|                        |                   | urea                            | U5128-5KG                        | 43                                  |
| <b>Li-ion battery</b>  | anode             | graphite                        | 332461-12KG                      | 36.4                                |
|                        | cathode           | LiCoO <sub>2</sub>              | 442704-100G-A                    | 2090                                |
|                        | electrolyte       | LiPF <sub>6</sub> in EC/DEC/DMC | 901685-500ML                     | 1490                                |
| <b>Pb-acid battery</b> | anode             | Pb foil                         | GF03246465-2EA                   | 131                                 |
|                        | cathode           | PbO <sub>2</sub>                | AC217530025<br>(from Alfa Aesar) | 272                                 |
|                        | electrolyte       | H <sub>2</sub> SO <sub>4</sub>  | 1603131000                       | 22                                  |

## Supplementary References

- 1 Gao, T. *et al.* A rechargeable Al/S battery with an ionic-liquid electrolyte. *Angew. Chem. Int. Ed.* **55**, 9898-9901 (2016).
- 2 Yu, X., Boyer, M. J., Hwang, G. S. & Manthiram, A. room-temperature aluminum-sulfur batteries with a lithium-ion-mediated ionic liquid electrolyte. *Chem* **4**, 586-598 (2018).
- 3 Yang, H. *et al.* An aluminum-sulfur battery with a fast kinetic response. *Angew. Chem. Int. Ed.* **57**, 1898-1902 (2018).
- 4 Guo, Y. *et al.* Rechargeable aluminium-sulfur battery with improved electrochemical performance by cobalt-containing electrocatalyst. *Angew. Chem. Int. Ed.* **59**, 22963-22967 (2020).
- 5 Yu, X. & Manthiram, A. Electrochemical energy storage with a reversible nonaqueous room-temperature aluminum-sulfur chemistry. *Adv. Energy Mater.* **7**, 1700561 (2017).
- 6 Wang, H. *et al.* Binder-free V<sub>2</sub>O<sub>5</sub> cathode for greener rechargeable aluminum battery. *ACS Appl. Mater. Interfaces* **7**, 80-84 (2015).
- 7 Jayaprakash, N., Das, S. K. & Archer, L. A. The rechargeable aluminum-ion battery. *Chem. Commun.* **47**, 12610-12612 (2011).
- 8 Koketsu, T. *et al.* Reversible magnesium and aluminium ions insertion in cation-deficient anatase TiO<sub>2</sub>. *Nat. Mater.* **16**, 1142-1150 (2017).
- 9 Liu, J., Li, Z., Huo, X. & Li, J. Nanosphere-rod-like Co<sub>3</sub>O<sub>4</sub> as high performance cathode material for aluminium ion batteries. *J. Power Sources* **422**, 49-56 (2019).
- 10 Li, H. *et al.* A highly reversible Co<sub>3</sub>S<sub>4</sub> microsphere cathode material for aluminum-ion batteries. *Nano Energy* **56**, 100-108 (2019).
- 11 Geng, L., Lv, G., Xing, X. & Guo, J. Reversible electrochemical intercalation of aluminum in Mo<sub>6</sub>S<sub>8</sub>. *Chem. Mater.* **27**, 4926-4929 (2015).
- 12 Wang, S. *et al.* High-performance aluminum-ion battery with CuS@C microsphere composite cathode. *ACS Nano* **11**, 469-477 (2017).
- 13 Li, Z. Y., Niu, B. B., Liu, J., Li, J. L. & Kang, F. Y. Rechargeable aluminum-ion battery based on MoS<sub>2</sub> microsphere cathode. *ACS Appl. Mater. Interfaces* **10**, 9451-9459 (2018).
- 14 Suto, K. *et al.* Electrochemical properties of Al/vanadium chloride batteries with AlCl<sub>3</sub>-1-ethyl-3-methylimidazolium chloride electrolyte. *J. Electrochem. Soc.* **163**, A742-A747

(2016).

15 Hudak, N. S. Chloroaluminate-doped conducting polymers as positive electrodes in rechargeable aluminum batteries. *J. Phy. Chem. C* **118**, 5203-5215 (2014).

16 Lin, M.-C. *et al.* An ultrafast rechargeable aluminium-ion battery. *Nature* **520**, 324-328 (2015).

17 Sun, H. B. *et al.* A new aluminium-ion battery with high voltage, high safety and low cost. *Chem. Commun.* **51**, 11892-11895 (2015).

18 Yu, X., Wang, B., Gong, D., Xu, Z. & Lu, B. Graphene nanoribbons on highly porous 3D graphene for high-capacity and ultrastable Al-ion batteries. *Adv. Mater.* **29**, 1604118 (2017).
